# Supplementary material for: Role of Nodulation-Enhancing Rhizobacteria in the Promotion of Medicago sativa Development in Nutrient-Poor Soils
Source: MDPI journal article supplement (doi:10.3390/plants11091164), 2022-04-26
Supplement: s1 [file s1]

**Table S1.** PGP properties showed by isolated rhizobacteria.  
Selected strains appear in bold.

| Strain    | Phosphate solubilization | Siderophore production | IAA          | N fixation | Biofilm | ACC deaminase activity |
|-----------|--------------------------|------------------------|--------------|------------|---------|------------------------|
| <b>L1</b> | <b>8</b>                 | <b>16</b>              | <b>2.051</b> | +          | +       | -                      |
| <b>L2</b> | <b>8</b>                 | <b>20</b>              | <b>6.522</b> | +          | -       | <b>1.072</b>           |
| <b>L3</b> | <b>12</b>                | <b>20</b>              | <b>2.069</b> | +          | -       | <b>1.113</b>           |
| L4        | 14                       | 26                     | 2.144        | -          | -       | 1.029                  |
| L5        | 12                       | -                      | 2.010        | +          | -       | -                      |
| L6        | 8                        | 20                     | 2.096        | +          | -       | 1.257                  |
| L7        | 6                        | 16                     | 2.100        | +          | -       | -                      |
| L8        | 14                       | 22                     | 2.121        | +          | -       | 2.087                  |
| L10       | 12                       | 22                     | 6.759        | +          | -       | 1.493                  |
| L11       | 8                        | 20                     | 2.091        | +          | +       | -                      |
| L12       | 6                        | 18                     | 2.152        | +          | -       | -                      |
| L13       | 6                        | 16                     | 2.071        | -          | -       | -                      |
| L14       | 6                        | 20                     | 2.080        | +          | -       | 1.684                  |
| L15       | 18                       | -                      | 11.133       | +          | -       | -                      |

+, presence of the property; -, absence of the property. Values of phosphate solubilization and siderophores production express the diameter of the halo in mm. Values of IAA production are expressed in mg·l<sup>-1</sup>. Values of ACC deaminase activity are expressed in μmoles α-ketobutyrate·mg protein<sup>-1</sup>·h<sup>-1</sup>.

**Table S2.** Morphological characteristics of the isolates.  
Selected strains appear in bold.

| Morphological characteristics          | Strain                                                          |
|----------------------------------------|-----------------------------------------------------------------|
| Rod-shape Gram-negative                | <b>L1, L2, L4, L6, L7, L8, L10, L11, L12, L13, L14, and L15</b> |
| Rod-shape Gram-positive                | <b>L3</b>                                                       |
| Rod-shape and sporulated Gram-positive | <b>L5</b>                                                       |

**Table S3.** Enzymatic activities detected in isolated bacteria.  
Selected strains appear in bold.

| Strain    | DNAse | Amylase | Cellulase | Lipase | Pectinase | Protease | Chitinase |
|-----------|-------|---------|-----------|--------|-----------|----------|-----------|
| <b>L1</b> | -     | -       | -         | -      | +         | +        | -         |
| <b>L2</b> | -     | -       | -         | -      | +         | +        | -         |
| <b>L3</b> | -     | -       | +         | -      | -         | +        | +         |
| L4        | -     | -       | -         | -      | -         | -        | -         |
| L5        | -     | -       | -         | -      | -         | -        | -         |
| L7        | -     | -       | -         | -      | -         | -        | -         |
| L6        | -     | -       | -         | -      | -         | -        | -         |
| L7        | -     | -       | -         | -      | -         | -        | -         |
| L8        | -     | -       | -         | -      | -         | -        | -         |
| L10       | -     | -       | -         | -      | -         | -        | -         |
| L11       | -     | -       | -         | -      | -         | -        | -         |
| L12       | -     | -       | -         | -      | -         | -        | -         |
| L13       | -     | -       | -         | -      | -         | -        | -         |
| L14       | -     | -       | -         | -      | -         | -        | -         |
| L15       | -     | -       | -         | -      | -         | -        | -         |

+, presence of the activity; -, absence of the activity.

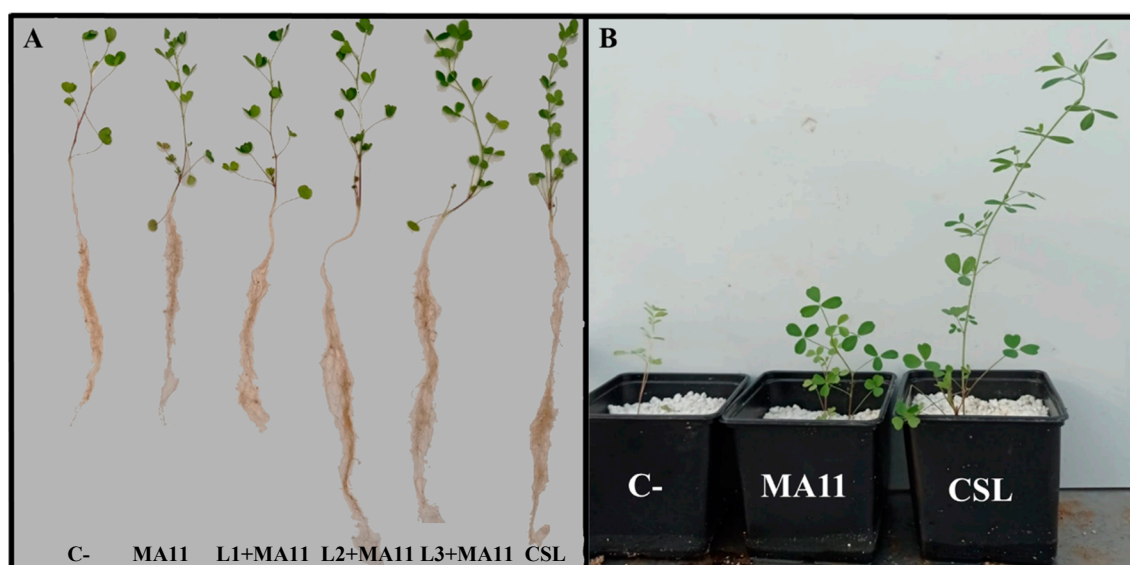

**Figure S1.** Comparison of plant size of the different inoculation treatments after 60 days from germination under greenhouse conditions and nutrient-poor soils as substrate. **(A)** Length of aerial part and roots of *M. sativa* of all the treatments; **(B)** Comparison of control plants, inoculated plants with MA11, and inoculated plants with the *consortium*. C-: without inoculation; MA11: inoculation with *E. medicae* MA11; L1+MA11: inoculation with strains L1 and MA11; L2+MA11: inoculation with strains L2 and MA11; L3+MA11: inoculation with strains L3 and MA11; CSL: inoculation with a *consortium* of strains L1, L2, L3, and MA11.

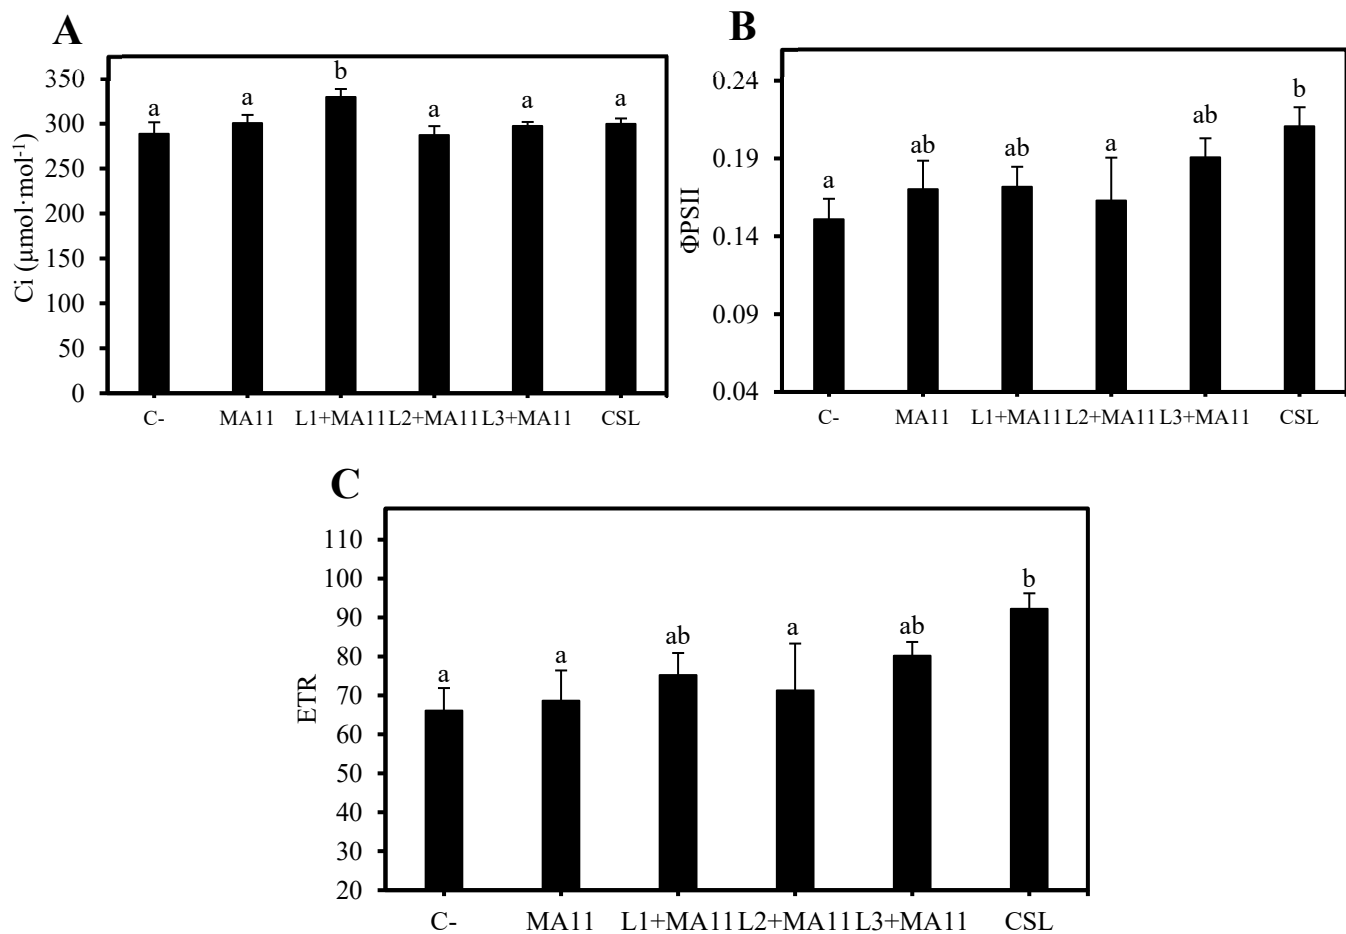

**Figure S2. Photosynthetic parameters.** (A) Intercellular  $\text{CO}_2$  concentration, (B) PSII operational and maximum quantum yield, and (C) electron transport rate in plants of *M. sativa* 60 days under greenhouse conditions from germination with a nutrient-poor soil as substrate and different inoculation treatments. Values are means  $\pm$  S.D. ( $n = 16$ ). Different letters indicate means that are significantly different from each other (one-way ANOVA; LSD test,  $P < 0.005$ ). C-: without inoculation; MA11: inoculation with *E. medicae* MA11; L1+MA11: inoculation with strains L1 and MA11; L2+MA11: inoculation with strains L2 and MA11; L3+MA11: inoculation with strains L3 and MA11; CSL: inoculation with a *consortium* of strains L1, L2, L3, and MA11.
